# Supplementary material for: Enhancing the thermal and mechanical properties of epoxy resins by addition of a hyperbranched aromatic polyamide grown on microcrystalline cellulose fibers
Source: Royal Society of Chemistry journal article supplement (doi:10.1039/c3ra45732j), 2014-01-01
Supplement: c3ra45732j1.pdf [file c3ra45732j1.pdf]

## SUPPORTING INFORMATION

# Enhancing the Thermal and Mechanical properties of Epoxy Resins by Addition of Hyperbranched Aromatic Polyamide Grown on Microcrystalline Cellulose Fibers

*Xiane Xiao<sup>1</sup>, Shaorong Lu<sup>1\*</sup>, Bo Qi<sup>1</sup>, Cen Zeng<sup>1</sup>, Zhengkai Yuan<sup>1</sup>, Jinhong Yu<sup>1,2\*</sup>*

*<sup>1</sup>Key Laboratory of New Processing Technology for Nonferrous Metals and Materials, Ministry of Education, School of Material Science and Engineering, Guilin University of Technology, Guilin 541004, China.*

*<sup>2</sup>Key Laboratory of Marine New Materials and Application Technology, Ningbo Institute of Material Technology & Engineering, Chinese Academy of Sciences, Ningbo, 315201, China*

\* Corresponding author. Fax: +86-773-5896671. Telephone: +86-773-5896438.

Electronic mail: [yujinhong@glut.edu.cn](mailto:yujinhong@glut.edu.cn) (J.H. Yu), [lushaor@163.com](mailto:lushaor@163.com) (S.R. Lu)

## SUPPLEMENT

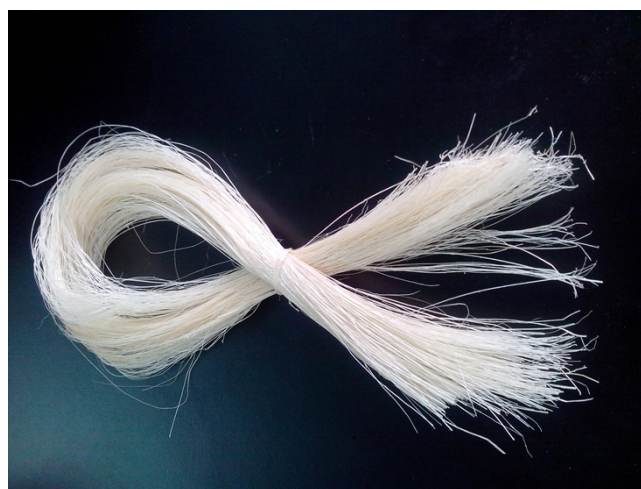

**Figure S1.** The digital photograph of raw sisal fibers.

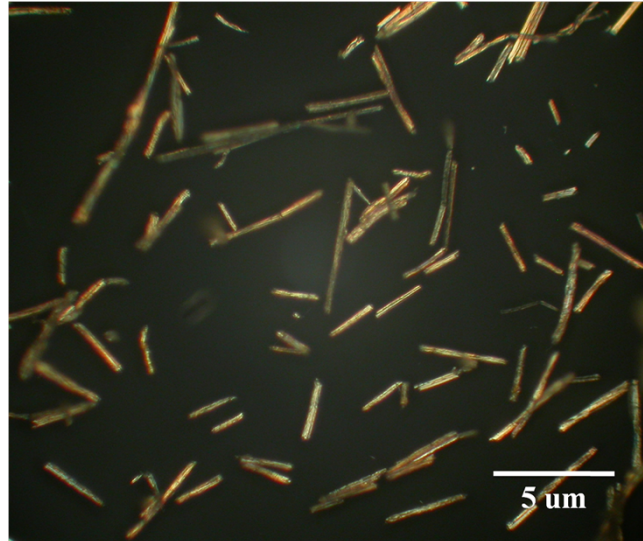

**Figure S2.** POM image of MCF fillers taken at room temperature.

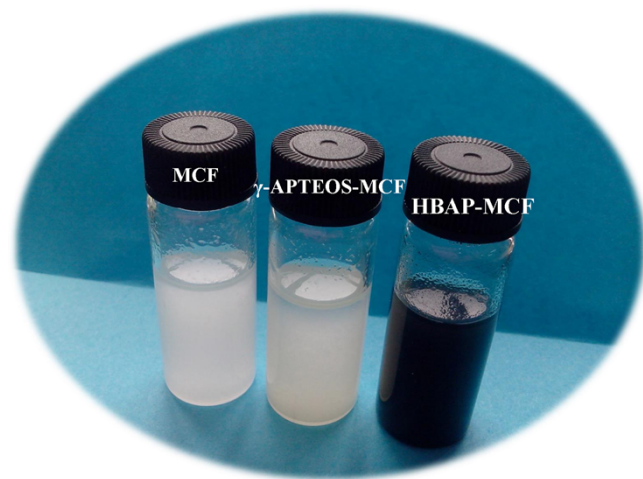

**Figure S3.** Digital photograph of suspensions of MCF,  $\gamma$ -APTEOS-MCF and HBAP-MCF in ethanol for 2 hours after ultrasonic treatment (0.5 mg/ml).

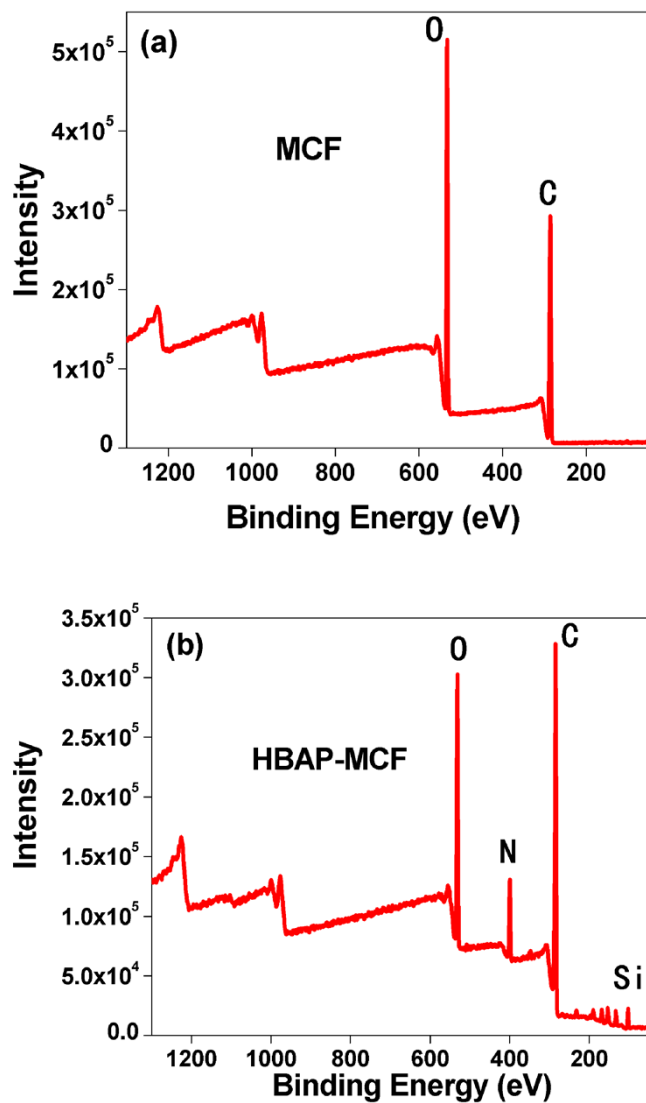

**Figure S4.** XPS survey spectra of (a) MCF and (b) HBAP-MCF.
